# Supplementary material for: 3D vascularised proximal tubules-on-a-multiplexed chip model for enhanced cell phenotypes
Source: Royal Society of Chemistry journal article supplement (doi:10.1039/d2lc00723a), 2023-01-01

### PTEC culture in tubule over time

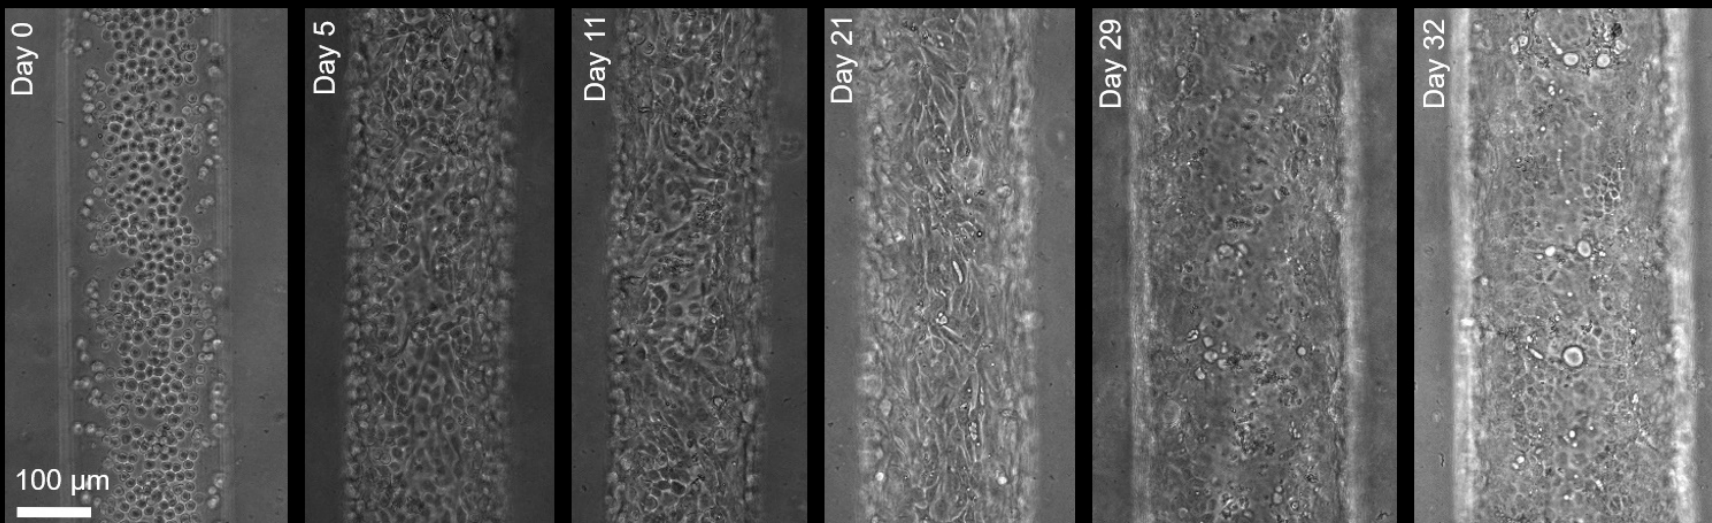

### HGECs added to second tubule on same chip on Day 29

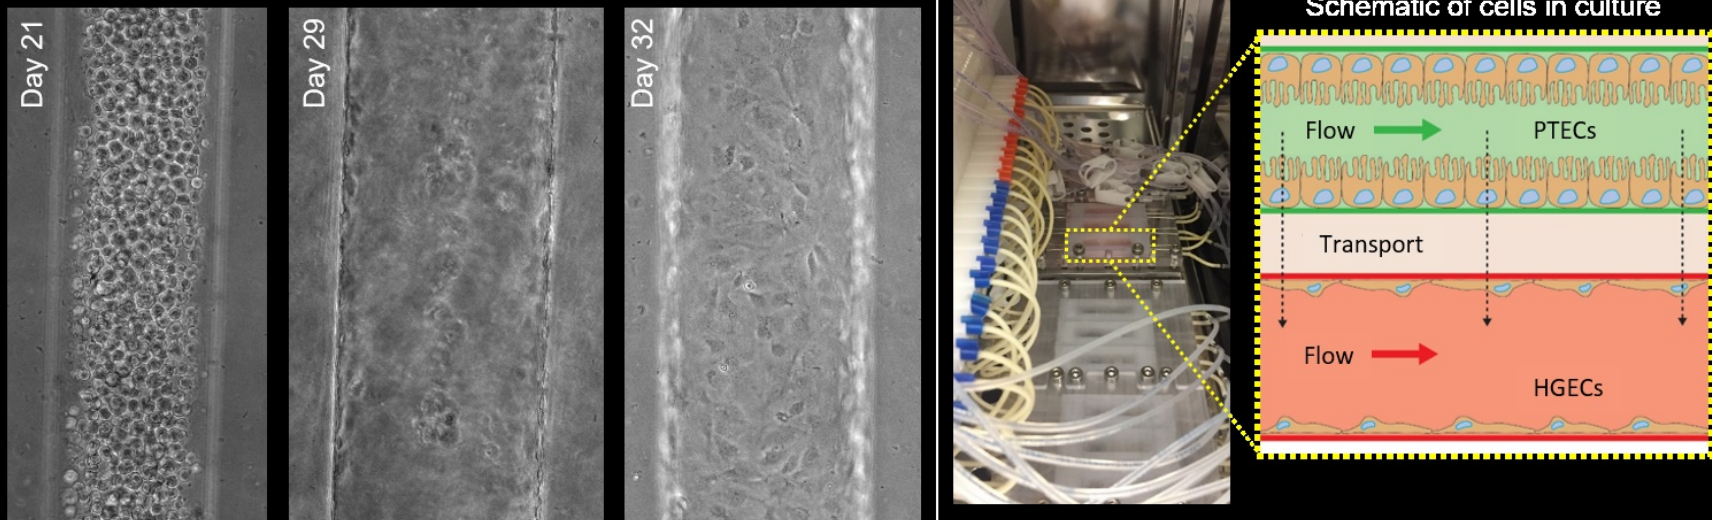

Supplement: d2lc00723a2.pdf [file d2lc00723a2.pdf]
